# Supplementary material for: COVID-19 Disease Severity among People with HIV Infection or Solid Organ Transplant in the United States: A Nationally-representative, Multicenter, Observational Cohort Study
Source: PubMed Central journal article supplement — medRxiv. 2021 Jul 28:2021.07.26.21261028. Preprint. [Version 1] doi: 10.1101/2021.07.26.21261028 (PMC8328066; doi:10.1101/2021.07.26.21261028), 2021-07-28
Supplement: NIHPP2021.07.26.21261028v1-supplement-1.pdf [file NIHPP2021.07.26.21261028v1-supplement-1.pdf]

## Supplementary Materials

### Supplementary Figure 1. Flow Diagram of Study Sample

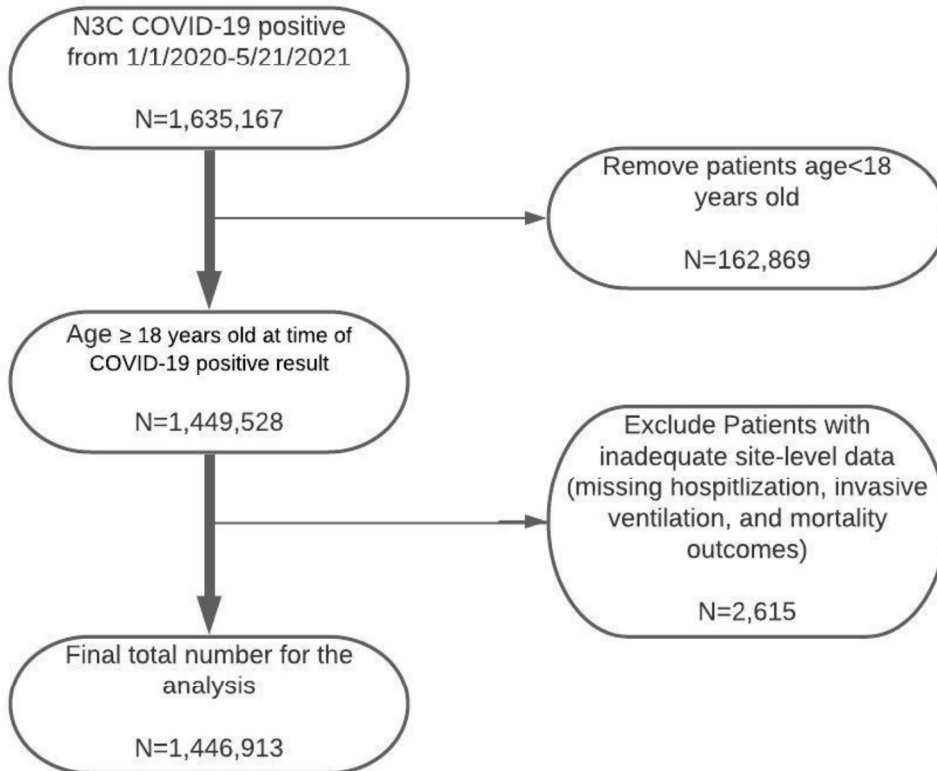

### Supplementary Table S-1. Key Variables and Concept Definitions

| Variable                                               | Concepts and Logic                                                                                                                                                                                                                                                                                                                                                                                                                                                                                                                                                                                                                                                                                                                                                                                                                                                                                                                                                                                                                                                                                                                                                                                                                                                                  |
|--------------------------------------------------------|-------------------------------------------------------------------------------------------------------------------------------------------------------------------------------------------------------------------------------------------------------------------------------------------------------------------------------------------------------------------------------------------------------------------------------------------------------------------------------------------------------------------------------------------------------------------------------------------------------------------------------------------------------------------------------------------------------------------------------------------------------------------------------------------------------------------------------------------------------------------------------------------------------------------------------------------------------------------------------------------------------------------------------------------------------------------------------------------------------------------------------------------------------------------------------------------------------------------------------------------------------------------------------------|
| <p><b>Key Exposures</b></p> <p>COVID-19 definition</p> | <p><b><u>Concept Set Names (latest codeset ID) with Description:</u></b></p> <p>N3C Covid diagnosis (35486128)<br/> <i>Description: Corresponds to ICD10CM Code: U07.1 (condition). Includes 1 Concept (Disease caused by 2019-nCoV - Concept Id: 840539006).</i></p> <p>ATLAS SARS-CoV-2 rt-PCR and AG (651620200)<br/> <i>Description: Includes 55 Concepts (Measurements), characterizing a positive PCR or Antigen test.</i></p> <p>Atlas #818 [N3C] CovidAntibody retry (45478367)<br/> <i>Description: Includes 24 Concepts (Measurements), characterizing a positive Antibody test.</i></p> <p>ResultsPos (400691529)<br/> <i>Description: Includes 6 Concepts, collecting all the affirmative measurement results</i></p> <p><b><u>Logic:</u></b><br/>           Patient record must be associated with a “N3C Covid diagnosis”</p> <p>OR</p> <p>have at least one of the covid measurement concepts (“ATLAS SARS-CoV-2 rt-PCR and AG” or “[N3C CovidAntibody retry”) AND a positive result (“ResultsPos”)</p>                                                                                                                                                                                                                                                              |
| <p>HIV infection</p>                                   | <p><b><u>Concept Set Names (latest codeset ID):</u></b></p> <p>HIV drugs (331061593)<br/>           hiv infection (382527336)<br/>           cs_isc_hiv_labs_procedures (684826767)</p> <p><b><u>PrEP Concept IDs and Names:</u></b></p> <p>35606583 emtricitabine 100 MG / tenofovir disoproxil fumarate 150 MG Oral Tablet [Truvada]<br/>           1710316 emtricitabine 200 MG / tenofovir disoproxil fumarate 300 MG Oral Tablet [Truvada]<br/>           35606591 emtricitabine 167 MG / tenofovir disoproxil fumarate 250 MG Oral Tablet [Truvada]<br/>           35604225 emtricitabine 200 MG / tenofovir alafenamide 25 MG Oral Tablet<br/>           35606585 emtricitabine 133 MG / tenofovir disoproxil fumarate 200 MG Oral Tablet<br/>           35606581 emtricitabine 100 MG / tenofovir disoproxil fumarate 150 MG Oral Tablet<br/>           1703093 emtricitabine 200 MG / tenofovir disoproxil fumarate 300 MG Oral Tablet<br/>           35604229 emtricitabine 200 MG / tenofovir alafenamide 25 MG Oral Tablet [Descovy]</p> <p><b><u>Logic:</u></b><br/>           Included in cohort if patient is associated with at least one of the concept sets listed in either the condition, procedures, or drugs tables. Patients only on PrEP were excluded.</p> |
| <p>Solid organ transplant definition</p>               | <p><b><u>Concept Set Names (latest codeset ID):</u></b></p> <p>[N3C] [ISC] Kidney Transplant Rejection (25243076)<br/>           [N3C] [ISC] Heart Transplant Rejection (610701999)<br/>           [N3C] [ISC] Liver Transplant Rejection (184979218)</p>                                                                                                                                                                                                                                                                                                                                                                                                                                                                                                                                                                                                                                                                                                                                                                                                                                                                                                                                                                                                                           |

|                               |                                                                                                                                                                                                                                                                                                                                                                                                                                                                                                                                                                                                                                                                                                                                                                                                         |
|-------------------------------|---------------------------------------------------------------------------------------------------------------------------------------------------------------------------------------------------------------------------------------------------------------------------------------------------------------------------------------------------------------------------------------------------------------------------------------------------------------------------------------------------------------------------------------------------------------------------------------------------------------------------------------------------------------------------------------------------------------------------------------------------------------------------------------------------------|
|                               | <p>[N3C] [ISC] Kidney Transplant Failure (562737056)<br/>         [N3C] [ISC] Lung Transplant Rejection (784946326)<br/>         [N3C] [ISC] Heart Transplant Failure (708583955)<br/>         [N3C] [ISC] Liver Transplant Failure (663753516)<br/>         [N3C] [ISC] Lung Transplant Failure (818309036)<br/>         [N3C] [ISC] Kidney Transplant (21035617)<br/>         [N3C] [ISC] Heart Transplant (976928531)<br/>         [N3C] [ISC] Liver Transplant (204996696)<br/>         [N3C] [ISC] Lung Transplant (402177099)<br/>         [N3C] [ISC] Pancreas Transplant (788127890)</p> <p><b>Logic:</b><br/>         All patients associated with at least one of the listed concept sets, including records from the observation, procedure_occurrence, and condition_occurrence tables.</p> |
| <b>Outcomes</b>               |                                                                                                                                                                                                                                                                                                                                                                                                                                                                                                                                                                                                                                                                                                                                                                                                         |
| Emergency<br>Department visit | <p><b>Visit Concept IDs and Names:</b><br/>         262 Emergency Room and Inpatient Visit<br/>         9203 Emergency Room Visit</p> <p><b>Logic:</b><br/>         No concept sets were used in this definition. Includes patients with a visit start date between 14 days prior to the earliest covid diagnosis to 45 days after covid diagnosis that are also associated with one of the listed visit concept IDs.</p>                                                                                                                                                                                                                                                                                                                                                                               |
| Hospitalization               | <p><b>Visit Concept IDs and Names:</b><br/>         262 Emergency Room and Inpatient Visit<br/>         8717 Inpatient Hospital<br/>         9201 Inpatient Visit<br/>         581379 Inpatient Critical Care Facility</p> <p><b>Logic:</b><br/>         No concept sets were used in this definition. Includes patients with a visit start date between 14 days prior to the earliest covid diagnosis to 45 days after covid diagnosis that are also associated with one of the listed visit concept IDs.</p>                                                                                                                                                                                                                                                                                          |
| Invasive<br>ventilation       | <p><b>Concept Set Names (latest codeset ID):</b><br/>         Invasive Mechanical Ventilation 2OCT20 (179437741)</p> <p><b>Logic:</b><br/>         Includes patients associated with any procedure codes in the concept sets listed that had a procedure date on or after the earliest covid diagnosis.</p>                                                                                                                                                                                                                                                                                                                                                                                                                                                                                             |
| ECMO                          | <p><b>Concept Set Names (latest codeset ID):</b><br/>         Kostka - ECMO (415149730)</p> <p><b>Logic:</b><br/>         Includes patients associated with any procedure codes in the concept sets listed that had a procedure date on or after the earliest covid diagnosis.</p>                                                                                                                                                                                                                                                                                                                                                                                                                                                                                                                      |
| Death                         | <p><b>Logic:</b></p>                                                                                                                                                                                                                                                                                                                                                                                                                                                                                                                                                                                                                                                                                                                                                                                    |

|                                                                                  |                                                                                                                                                                                                                                                                                                                                         |
|----------------------------------------------------------------------------------|-----------------------------------------------------------------------------------------------------------------------------------------------------------------------------------------------------------------------------------------------------------------------------------------------------------------------------------------|
|                                                                                  | No concepts or concept sets were used. Patients were flagged as deceased if a valid entry with a date was included in the death table, which is part of the OMOP data model used in the Enclave.                                                                                                                                        |
| <b>Comorbid Conditions</b>                                                       |                                                                                                                                                                                                                                                                                                                                         |
| Severe cardiovascular event (Congestive heart failure and myocardial infarction) | <p><b><u>Concept Set Names (latest codeset ID):</u></b><br/>           Charlson - CHF (359043664)<br/>           Charlson - MI (259495957)</p> <p><b><u>Logic:</u></b><br/>           Includes patients associated with any condition codes in the concept sets listed with an occurrence date before the earliest covid diagnosis.</p> |
| Peripheral vascular diseases                                                     | <p><b><u>Concept Set Names (latest codeset ID):</u></b><br/>           Charlson - PVD (376881697)</p> <p><b><u>Logic:</u></b><br/>           Includes patients associated with any condition codes in the concept sets listed with an occurrence date before the earliest covid diagnosis.</p>                                          |
| Stroke                                                                           | <p><b><u>Concept Set Names (latest codeset ID):</u></b><br/>           Charlson - Stroke (652711186)</p> <p><b><u>Logic:</u></b><br/>           Includes patients associated with any condition codes in the concept sets listed with an occurrence date before the earliest covid diagnosis.</p>                                       |
| Dementia                                                                         | <p><b><u>Concept Set Names (latest codeset ID):</u></b><br/>           Charlson - Dementia (78746470)</p> <p><b><u>Logic:</u></b><br/>           Includes patients associated with any condition codes in the concept sets listed with an occurrence date before the earliest covid diagnosis.</p>                                      |
| Pulmonary Diseases                                                               | <p><b><u>Concept Set Names (latest codeset ID):</u></b><br/>           Charlson - Pulmonary (514953976)</p> <p><b><u>Logic:</u></b><br/>           Includes patients associated with any condition codes in the concept sets listed with an occurrence date before the earliest covid diagnosis.</p>                                    |
| Rheumatic Diseases                                                               | <p><b><u>Concept Set Names (latest codeset ID):</u></b><br/>           Charlson - Rheumatic (765004404)</p> <p><b><u>Logic:</u></b><br/>           Includes patients associated with any condition codes in the concept sets listed with an occurrence date before the earliest covid diagnosis.</p>                                    |
| Peptic ulcer diseases                                                            | <p><b><u>Concept Set Names (latest codeset ID):</u></b><br/>           Charlson - PUD (510748896)</p> <p><b><u>Logic:</u></b><br/>           Includes patients associated with any condition codes in the concept sets listed with an occurrence date before the earliest covid diagnosis.</p>                                          |

|                                                                                       |                                                                                                                                                                                                                                                                                                                                                        |
|---------------------------------------------------------------------------------------|--------------------------------------------------------------------------------------------------------------------------------------------------------------------------------------------------------------------------------------------------------------------------------------------------------------------------------------------------------|
| <p>Liver diseases (mild and severe liver diseases)</p>                                | <p><b><u>Concept Set Names (latest codeset ID):</u></b><br/>           Charlson - LiverMild (494981955)<br/>           Charlson - LiverSevere (248333963)</p> <p><b><u>Logic:</u></b><br/>           Includes patients associated with any condition codes in the concept sets listed with an occurrence date before the earliest covid diagnosis.</p> |
| <p>Diabetes mellitus (diabetes mellitus and diabetes mellitus with complications)</p> | <p><b><u>Concept Set Names (latest codeset ID):</u></b><br/>           Charlson - DM (719585646)<br/>           Charlson - DMcx (403438288)</p> <p><b><u>Logic:</u></b><br/>           Includes patients associated with any condition codes in the concept sets listed with an occurrence date before the earliest covid diagnosis.</p>               |
| <p>Renal diseases</p>                                                                 | <p><b><u>Concept Set Names (latest codeset ID):</u></b><br/>           Charlson - Renal (220495690)</p> <p><b><u>Logic:</u></b><br/>           Includes patients associated with any condition codes in the concept sets listed with an occurrence date before the earliest covid diagnosis.</p>                                                       |
| <p>Cancer (metastatic and non-metastatic)</p>                                         | <p><b><u>Concept Set Names (latest codeset ID):</u></b><br/>           Charlson - Cancer (535274723)<br/>           Charlson - Mets (378462283)</p> <p><b><u>Logic:</u></b><br/>           Includes patients associated with any condition codes in the concept sets listed with an occurrence date before the earliest covid diagnosis.</p>           |

**Supplementary Table S-2. Invasive Mechanical Ventilation Use among COVID-19 Patients Admitted to Emergency Department or Hospital by Immunosuppression group.**

| Immunosuppression group<br>N = 413,292 | Crude estimates  |         | Adjusted estimates A |         | Adjusted estimates B |         |
|----------------------------------------|------------------|---------|----------------------|---------|----------------------|---------|
|                                        | OR (95% CI)      | P-value | OR (95% CI)          | P-value | OR (95% CI)          | P-value |
| HIV- & SOT- (N = 403,847)              | Ref.             | Ref.    | Ref.                 | Ref.    | Ref.                 | Ref.    |
| PWH (N = 2,611)                        | 1.85 (1.62-2.11) | <0.01   | 1.66 (1.46-1.90)     | <0.01   | 1.62 (1.42-1.85)     | <0.01   |
| SOT (N = 6,671)                        | 3.26 (3.05-3.49) | <0.01   | 2.86 (2.67-3.07)     | <0.01   | 2.29 (2.13-2.47)     | <0.01   |
| HIV+ & SOT+ (N = 163)                  | 3.63 (2.41-5.45) | <0.01   | 2.88 (1.9-4.36)      | <0.01   | 2.10 (1.38-3.19)     | <0.01   |

Model A adjusted for age, sex, race and ethnicity (Black non-Hispanic, white Hispanic, white non-Hispanic, others), smoking status, and study site.

Model B adjusted for age, sex, race and ethnicity (Black non-Hispanic, white Hispanic, white non-Hispanic, others), smoking status, study site, severe liver disease, diabetes, cancer, renal disease, and number of comorbidities (0, 1, 2, ≥3).

HIV- & SOT-: people without HIV or solid organ transplant; PWH: people with HIV; SOT: solid organ transplant patient; HIV+ & SOT+: PWH had solid organ transplant; OR: odds ratio; 95% CI: 95% confidence interval.

**Supplementary Table S-3. Characteristics of People with HIV by Their Laboratory Data Availability**

|                                       | <b>PWH with CD4 cell count data</b> | <b>PWH with HIV viral load data</b> | <b>all PWH*</b> |
|---------------------------------------|-------------------------------------|-------------------------------------|-----------------|
| <b>N</b>                              | N = 3,660                           | N = 1,424                           | N = 8,537       |
| <b>age, median (IQR)</b>              | 52 (39-60)                          | 52 (39-60)                          | 50 (37-59)      |
| <b>Age ≥ 60, N (%)</b>                | 946 (25.8)                          | 385 (27)                            | 2,087 (24.4)    |
| <b>female sex, N (%)</b>              | 871 (23.8)                          | 307 (21.6)                          | 2361 (27.7)     |
| <b>race and ethnicity, N (%)</b>      |                                     |                                     |                 |
| <b>White non-Hispanic</b>             | 1117 (30.5)                         | 1,117 (30.5)                        | 2982 (34.9)     |
| <b>Black non-Hispanic</b>             | 1200 (32.8)                         | 405 (28.4)                          | 2830 (33.1)     |
| <b>Hispanic</b>                       | 421 (11.5)                          | 229 (16.1)                          | 681 (9.4)       |
| <b>Others</b>                         | 922 (25.2)                          | 274 (19.2)                          | 1,985 (23.3)    |
| <b>smoking status, N (%)</b>          |                                     |                                     |                 |
| <b>current or former</b>              | 1985 (23.3)                         | 430 (30.2)                          | 2198 (25.7)     |
| <b>non-smoker</b>                     | 2,198 (25.7)                        | 994 (69.8)                          | 6413 (75.1)     |
| <b>unknown</b>                        | 35 (1)                              | <20                                 | 74 (0.9)        |
| <b>number of comorbidities, N (%)</b> |                                     |                                     |                 |
| <b>0</b>                              | 1572 (43)                           | 576 (40.4)                          | 4,269 (50)      |
| <b>1</b>                              | 1,047 (28.6)                        | 442 (31)                            | 2,099 (24.6)    |
| <b>2</b>                              | 533 (14.6)                          | 225 (15.8)                          | 1,077 (12.6)    |
| <b>≥ 3</b>                            | 508 (13.9)                          | 181 (12.7)                          | 1,092 (12.8)    |

Note: N3C policy does not allow reporting of cells with less than 20 patients, indicated as “<20”.

PWH=people with HIV

\*All PWH included people with HIV alone and people with HIV and solid organ transplant.
